# Supplementary material for: Superior energy storage properties and excellent stability of novel NaNbO3-based lead-free ceramics with A-site vacancy obtained via a Bi2O3 substitution strategy
Source: Royal Society of Chemistry journal article supplement (doi:10.1039/c8ta07303a), 2018-01-01
Supplement: c8ta07303a1.pdf [file c8ta07303a1.pdf]

## Supporting Information

*Ultrahigh energy storage properties with excellent stability in novel NaNbO<sub>3</sub>-based lead-free ceramics with A-site vacancy: through Bi<sub>2</sub>O<sub>3</sub> substitution strategy*

Mingxing Zhou,<sup>ab</sup> Ruihong Liang,<sup>\*a</sup> Zhiyong Zhou,<sup>a</sup> and Xianlin Dong<sup>\*ac</sup>

<sup>a</sup> Key Laboratory of Inorganic Functional Materials and Devices, Shanghai Institute of Ceramics, Chinese Academy of Sciences, 588 Heshuo Road, Jiading District, Shanghai 201800, P. R. China

<sup>b</sup> University of Chinese Academy of Sciences, 19 Yuquan Road, Shijinshan District, Beijing 100049, P. R. China

<sup>c</sup> State Key Laboratory of High Performance Ceramics and Superfine Microstructure, Shanghai Institute of Ceramics, Chinese Academy of Sciences, 1295 Dingxi Road, Changning District, Shanghai 200050, P. R. China

### **\*Corresponding Authors**

E-mail: liangruihong@mail.sic.ac.cn; xldong@mail.sic.ac.cn

## Experimental procedures

The ceramics of the  $\text{Na}_{0.7}\text{Bi}_{0.1}\text{NbO}_3$  were prepared by conventional solid-state reaction with analytical pure starting chemicals of  $\text{Na}_2\text{CO}_3$  (99.5%),  $\text{Bi}_2\text{O}_3$  (99.99%), and  $\text{Nb}_2\text{O}_5$  (99.93%). Raw materials were mixed and ball milled for 24 hours with ethyl alcohol as dispersant. After drying, the mixture was calcined 900 °C for 3 hours in air. The calcined powder was remixed, dried and then pressed into 13-mm diameter pellets under pressure of 120 MPa after adding polyvinyl alcohol (PVA) as organic binders. After burning off PVA at 800 °C for 2 hours in air, sintering was carried out at the temperature of 1150 °C for 2 hours. In order to minimize the evaporation of elemental Na during the process of sintering, the samples were buried into the corresponding calcined powders, and a double-crucible method was applied. The sintered pellets were polished to  $0.2 \pm 0.02$  mm and coated with silver paste (the size of silver electrode is 4.5 mm in diameter and corresponding area is  $15.9 \text{ mm}^2$ ) in order to characterize electrical properties.

The crystal structure was examined by an X-ray diffraction (XRD, D/MAX-2550V; Rigaku, Tokyo, Japan) with a  $\text{Cu K}\alpha$  radiation. The surface morphology of the sample was investigated using a field emission scanning electron microscope (FESEM, Magellan400, FEI Company). Energy-dispersive X-ray spectroscopy (EDX) was collected from the attachment to the Magellan-400. The temperature dependence of dielectric constant ( $\epsilon_r$ ) and dielectric loss ( $\tan\delta$ ) were measured by a precision impedance analyzer (E4980A; Agilent, Palo Alto, CA) with temperature-variable furnace over a temperature range from -50 to 160 °C. Room temperature dielectric constant and  $\tan\delta$  were measured by a precision impedance analyzer (E4990A; Keysight, USA), which frequency range is from 20 Hz to 20 MHz. The DC breakdown strength measurement was performed using a Voltage-withstand testing device at room temperature. The unipolar polarization–electric field ( $P$ – $E$ ) hysteresis loops were measured by a commercial ferroelectric analyzer (TF Analyzer 2000, aixACCT, Aachen, Germany). The actual charge-discharge performance of the  $\text{Na}_{0.7}\text{Bi}_{0.1}\text{NbO}_3$  ceramics were investigated via a charge-discharge platform with a specially designed,

high-speed capacitor discharge resistance, inductance, and capacitance load circuit (RLC) (Fig. S4).

## Results and discussion

In order to investigate the relaxor behavior for  $\text{Na}_{0.7}\text{Bi}_{0.1}\text{NbO}_3$  ceramics, the modified Curie-Weiss equation is given in upper-left corner of the Fig. S1. The value of  $\gamma = 1$  indicates an ideal ferroelectric with a sharp phase transition, and it representing an obviously diffused transition with large deviation from the Curie-Weiss law when  $\gamma = 2$ . The plot of  $\ln(1/\epsilon - 1/\epsilon_{\max})$  as a function of  $\ln(T - T_{\max})$  for  $\text{Na}_{0.7}\text{Bi}_{0.1}\text{NbO}_3$  ceramics at 100 kHz is displayed in Fig. S1 by linear fitting with Curie-Weiss equation to calculate the  $\gamma$  value. The data about 100 kHz were chose here to minimize any space charge contribution to the dielectric constant. The result is 1.86 for  $\text{Na}_{0.7}\text{Bi}_{0.1}\text{NbO}_3$  ceramics, which indicates strong relaxation behavior. This phenomenon is attributed to the induced cation disorder due to the substitution of  $\text{Bi}^{3+}$  in A-site and formation of cationic vacancy.<sup>[1]</sup>

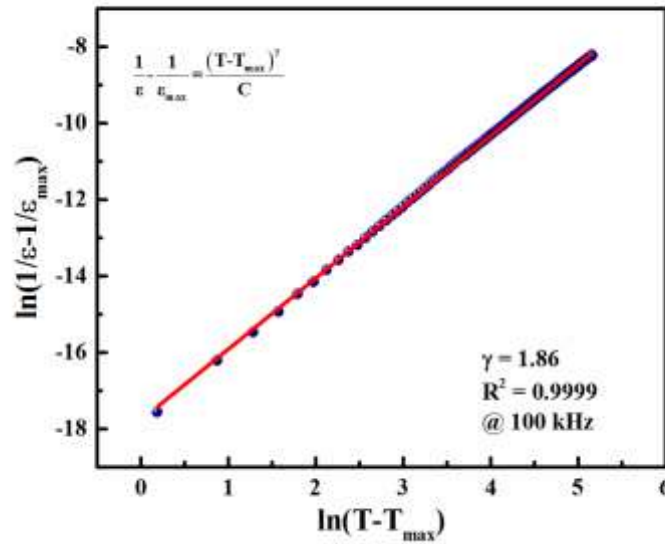

**Fig. S1** Plots of  $\ln(1/\epsilon - 1/\epsilon_{\max})$  versus  $\ln(T - T_m)$  of the  $\text{Na}_{0.7}\text{Bi}_{0.1}\text{NbO}_3$  ceramics.

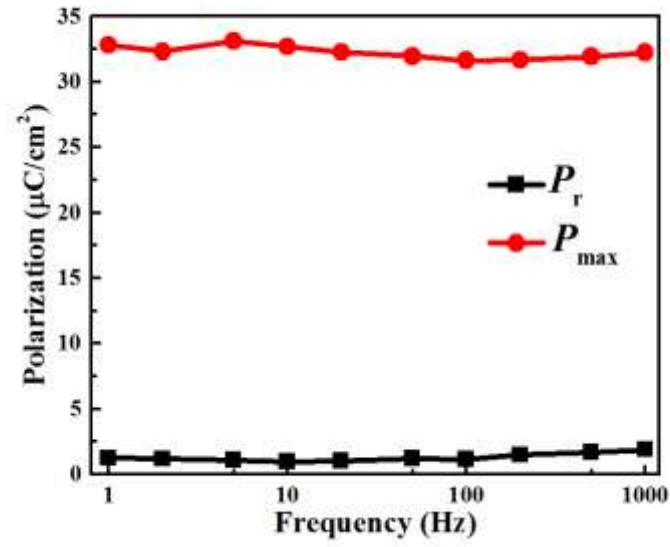

**Fig. S2** Frequency dependence of  $P_{\text{max}}$  and  $P_r$  of the  $\text{Na}_{0.7}\text{Bi}_{0.1}\text{NbO}_3$  ceramics.

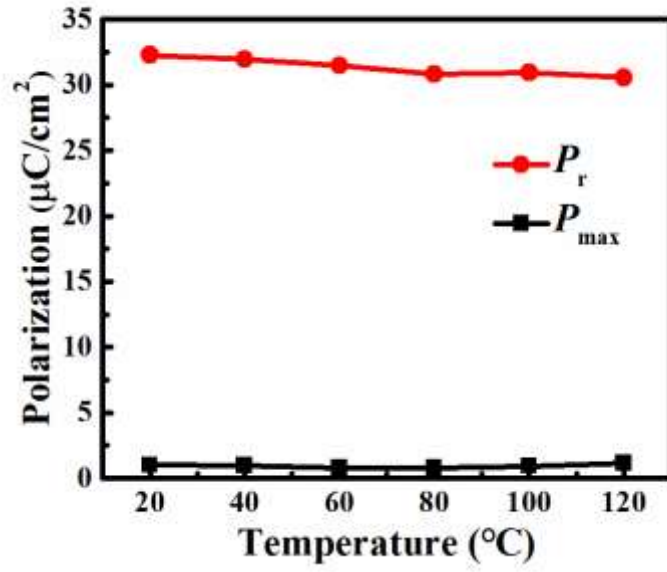

**Fig. S3** Temperature dependence of  $P_{\text{max}}$  and  $P_r$  of the  $\text{Na}_{0.7}\text{Bi}_{0.1}\text{NbO}_3$  ceramics.

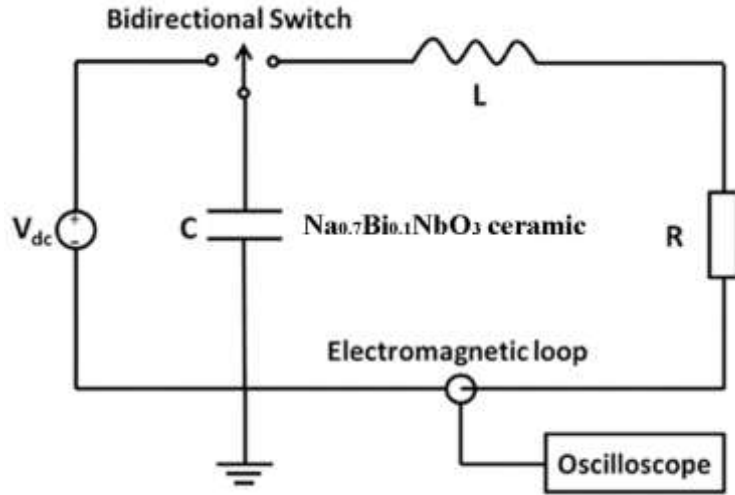

**Fig. S4** Schematic diagram of the charging-discharging cycle measuring system.

Table S1 compares the pulsed charge-discharge performance of the  $\text{Na}_{0.7}\text{Bi}_{0.1}\text{NbO}_3$  ceramics with those of recently reported systems. The ultrahigh values of  $C_D$  and  $P_D$  of the here present  $\text{Na}_{0.7}\text{Bi}_{0.1}\text{NbO}_3$  ceramics are superior to those of BNT-based ceramics, which currently present the best lead-free material, and obviously larger than those of other commercial lead-based anti-ferroelectric ceramics (mostly  $P_D < 10 \text{ MW/cm}^3$ , Table S1) <sup>[2-9]</sup>

**Table S1. Comparison of the charge-discharge properties of the  $\text{Na}_{0.7}\text{Bi}_{0.1}\text{NbO}_3$  ceramics and other reported ceramics.**

| Composition                                                                                                           | $E(\text{kV/mm})$ | $t_{0.90}(\mu\text{s})$ | $C_D(\text{A/cm}^2)$ | $P_D(\text{MW/cm}^3)$ | Ref       |
|-----------------------------------------------------------------------------------------------------------------------|-------------------|-------------------------|----------------------|-----------------------|-----------|
| $\text{Pb}_{0.90}\text{La}_{0.04}\text{Ba}_{0.04}(\text{Zr}_{0.616}\text{Sn}_{0.264}\text{Ti}_{0.12})\text{O}_3$      | 6.67              | ~1                      | ~242                 | ~1.95                 | [7]       |
| $\text{Pb}_{0.925}\text{La}_{0.05}(\text{Zr}_{0.42}\text{Sn}_{0.40}\text{Ti}_{0.18})\text{O}_3$                       | 3.5               | ~0.065                  | ~183                 | ~3.2                  | [5]       |
| $\text{Pb}_{0.93}\text{La}_{0.04}\text{Nb}_{0.02}(\text{Zr}_{0.42}\text{Sn}_{0.40}\text{Ti}_{0.18})_{0.98}\text{O}_3$ | 4.0               | ~0.500                  | ~143                 | ~2.9                  | [6]       |
| $\text{Pb}_{0.87}\text{Ba}_{0.1}\text{La}_{0.2}(\text{Zr}_{0.6}\text{Ti}_{0.07}\text{Sn}_{0.33})\text{O}_3$           | 6.0               | /                       | ~223                 | ~6.69                 | [2]       |
| $\text{Pb}_{0.98}\text{La}_{0.02}(\text{Zr}_{0.35}\text{Sn}_{0.55}\text{Ti}_{0.10})_{0.995}\text{O}_3$                | 8.2               | /                       | ~438                 | ~18.0                 | [9]       |
| BNT-BT-0.32SBT                                                                                                        | 6.0               | ~0.675                  | ~400                 | ~12.0                 | [2]       |
| $\text{Na}_{0.7}\text{Bi}_{0.1}\text{NbO}_3$                                                                          | 10.0              | ~0.155                  | ~1250                | ~62.5                 | This work |

## References:

- [1] J. Wu, A. Mahajan, L. Riekehr, H. Zhang, B. Yang, N. Meng, Z. Zhang, H. Yan, *Nano. Energy.*, 2018, **50**, 723.
- [2] F. Li, K. Yang, X. Liu, J. Zou, J. Zhai, B. Shen, P. Li, J. Shen, B. Liu, P. Chen, *Scripta. Mater.*, 2017, **141**, 15.
- [3] R. Xu, Z. Xu, Y. Feng, X. Wei, J. Tian, *J. Appl. Phys.*, 2016, **120**, 144102.
- [4] R. Xu, Z. Xu, Y. Feng, H. He, J. Tian, K. Yu, *Ceram. Int.*, 2016, **42**, 9094.
- [5] H. Zhang, X. Chen, F. Cao, G. Wang, X. Dong, Z. Hu, T. Du, *J. Am. Ceram. Soc.*, 2010, **93**, 4015.
- [6] X. Chen, H. Zhang, F. Cao, G. Wang, X. Dong, Y. Gu, H. He, Y. Liu, *J. Appl. Phys.*, 2009, **106**, 034105.
- [7] R. Xu, Z. Xu, Y. Feng, H. He, J. Tian, D. Huang, *J. Am. Ceram. Soc.*, 2016, **99**, 2984.
- [8] C. Xu, Z. Liu, X. Chen, S. Yan, F. Cao, X. Dong, G. Wang, *AIP Adv.*, 2017, **7**, 115108.
- [9] C. Xu, Z. Liu, X. Chen, S. Yan, F. Cao, X. Dong, G. Wang, *J. Appl. Phys.*, 2016, **120**, 074107.
